# Supplementary material for: Archaeal and bacterial diversity and community composition from 18 phylogenetically divergent sponge species in Vietnam
Source: PubMed Central journal article supplement (PMC5995103; doi:10.7717/peerj.4970), 2018-06-08

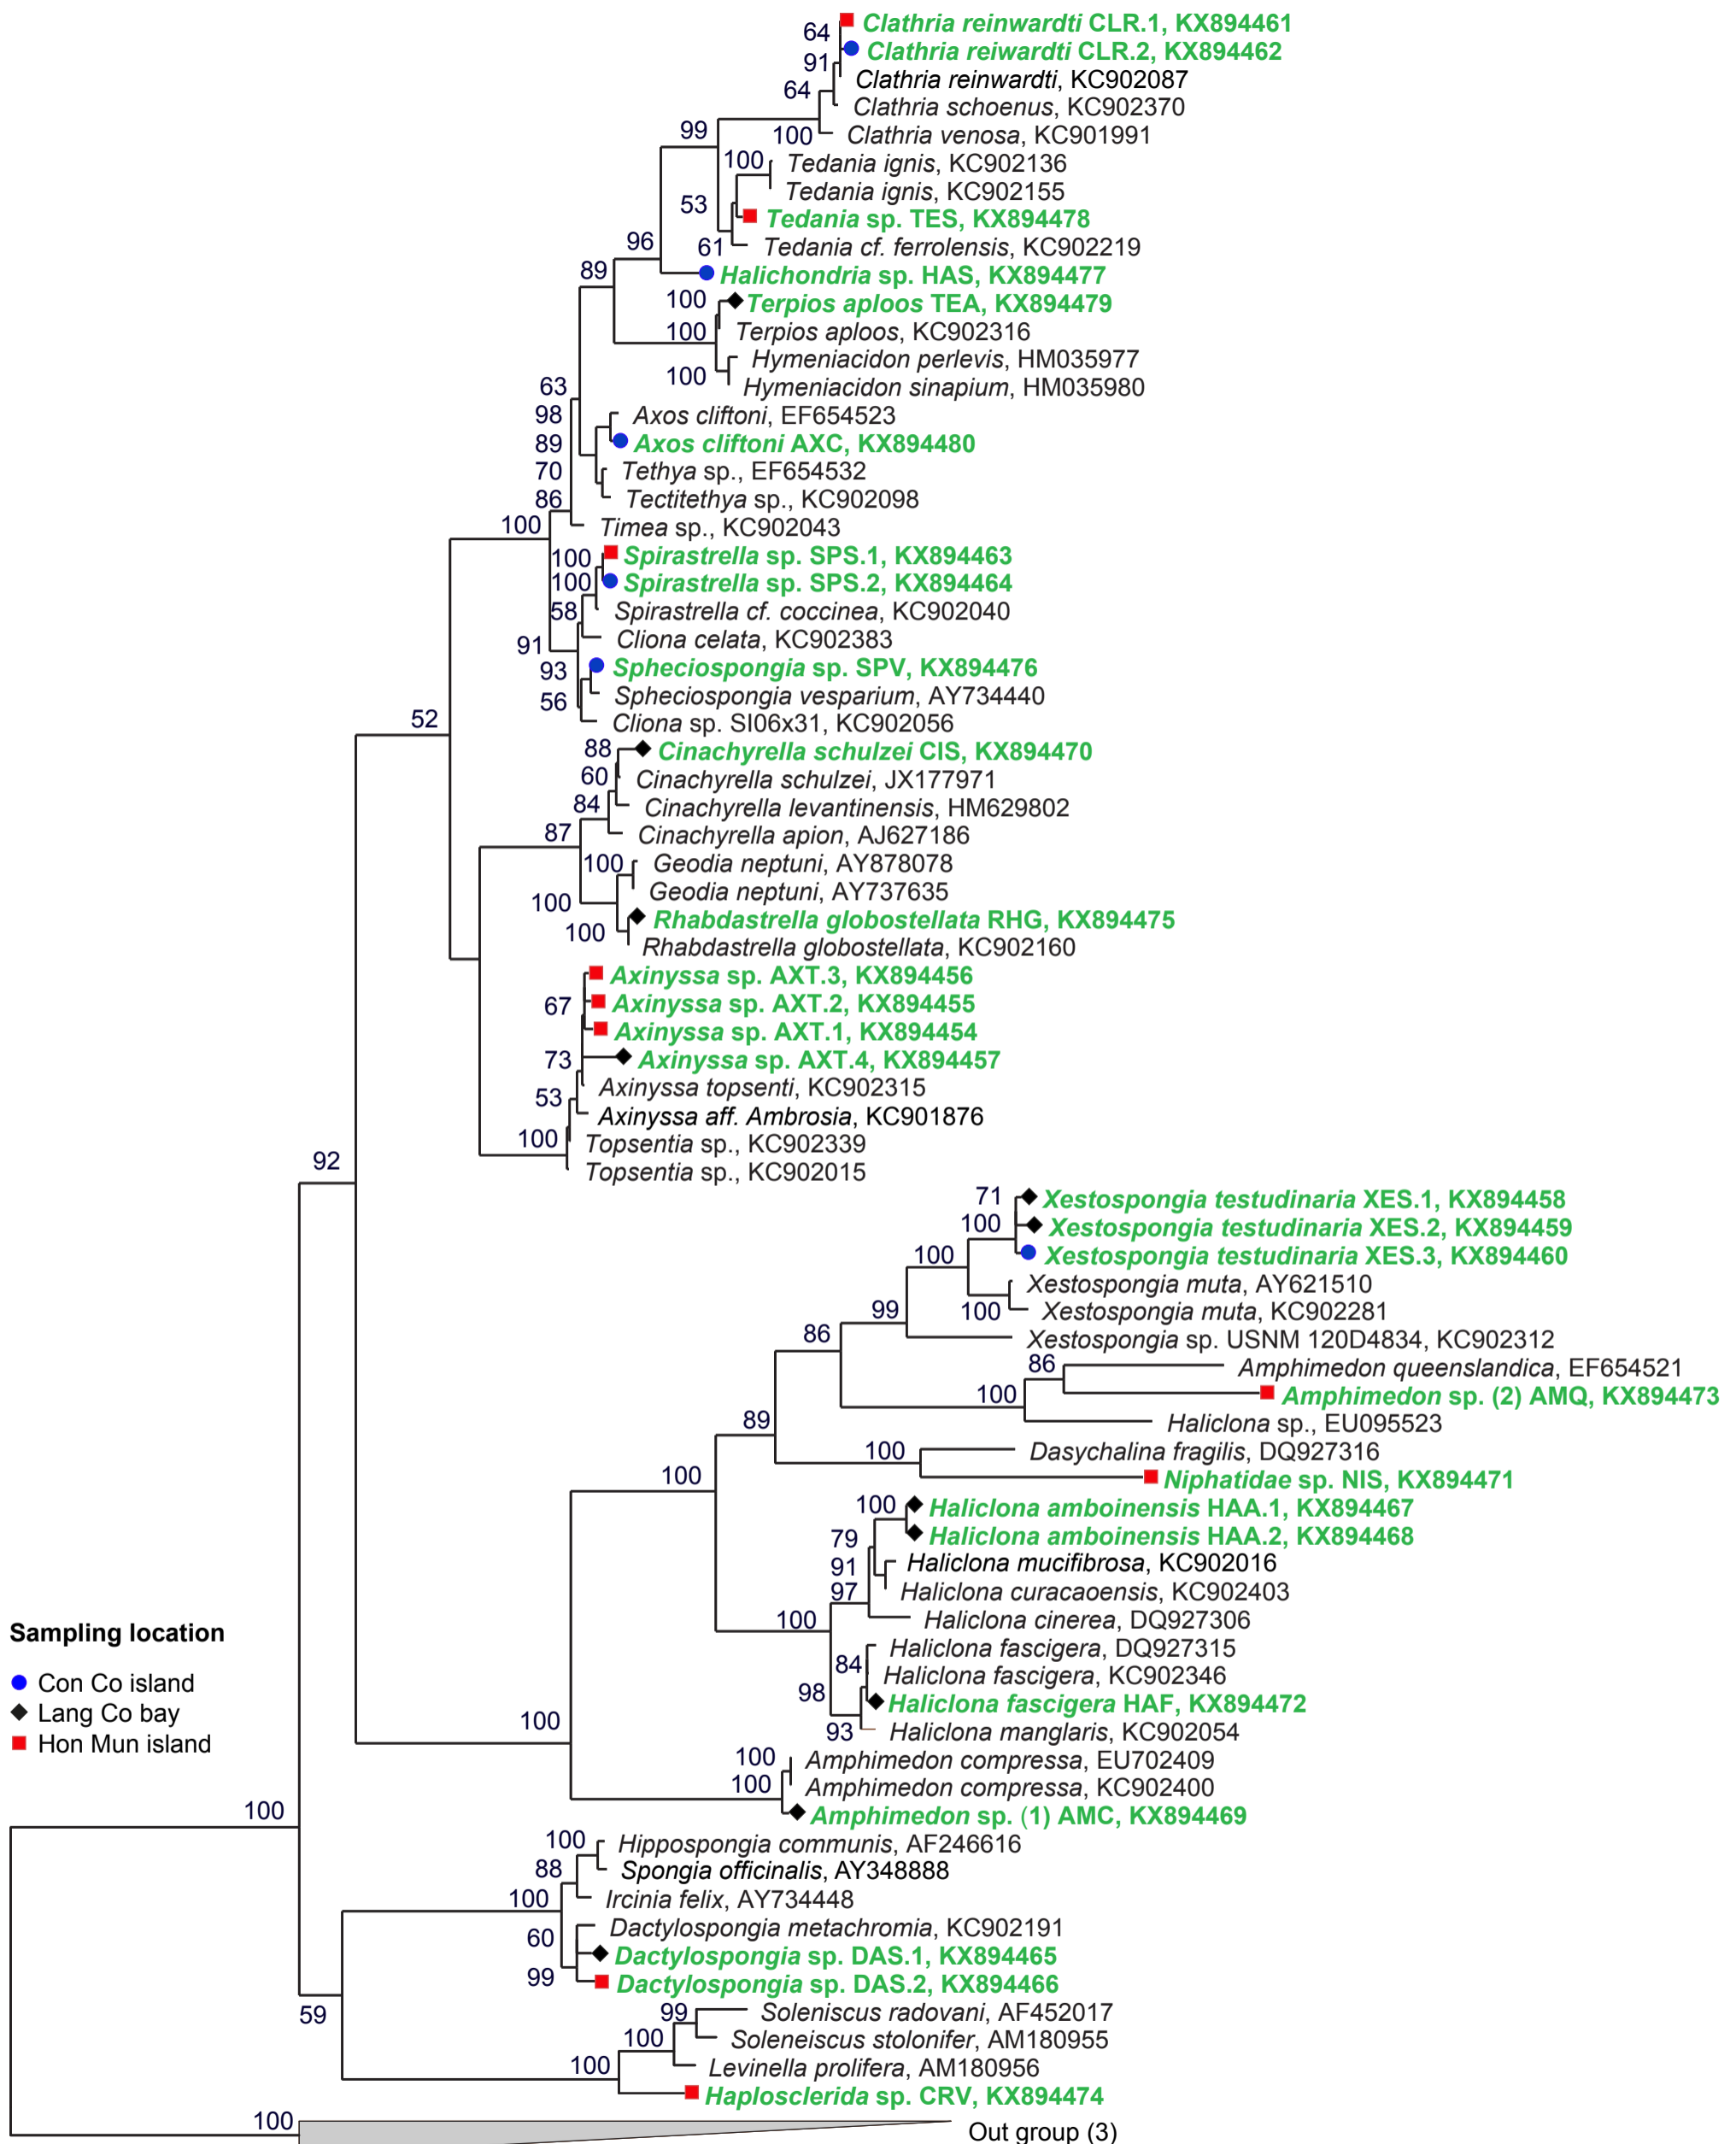

Supplement: peerj-06-4970-s006.pdf [file peerj-06-4970-s006.pdf]
