# Supplementary material for: Archaeal and bacterial diversity and community composition from 18 phylogenetically divergent sponge species in Vietnam
Source: PubMed Central journal article supplement (PMC5995103; doi:10.7717/peerj.4970), 2018-06-08
Supplement: peerj-06-4970-s011.pdf [file peerj-06-4970-s011.pdf]

OTU relative abundance (%)

Haploclerida sp.  
 Amphimedon sp. 2  
 Spirastrella sp.  
 Spirastrella sp.  
 T. aploos  
 Sphreciospongia sp.  
 A. cliffoni  
 C. schulzei  
 Amphimedon sp.  
 H. fascigera  
 Dactylospongia sp. 1  
 Dactylospongia sp.  
 H. amboinensis  
 H. amboinensis  
 X. testudinaria  
 X. testudinaria  
 X. testudinaria  
 R. globostellata  
 Halichondria  
 Tedania sp.  
 C. reinwardti  
 C. reinwardti  
 Axinyssa sp.  
 Axinyssa sp.  
 Axinyssa sp.  
 Niphatidae sp.

Sampling location  
 ● Con Co island  
 ◆ Lang Co bay  
 ■ Hon Mun island

OTU taxonomy

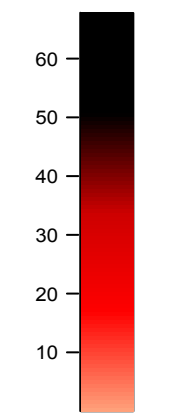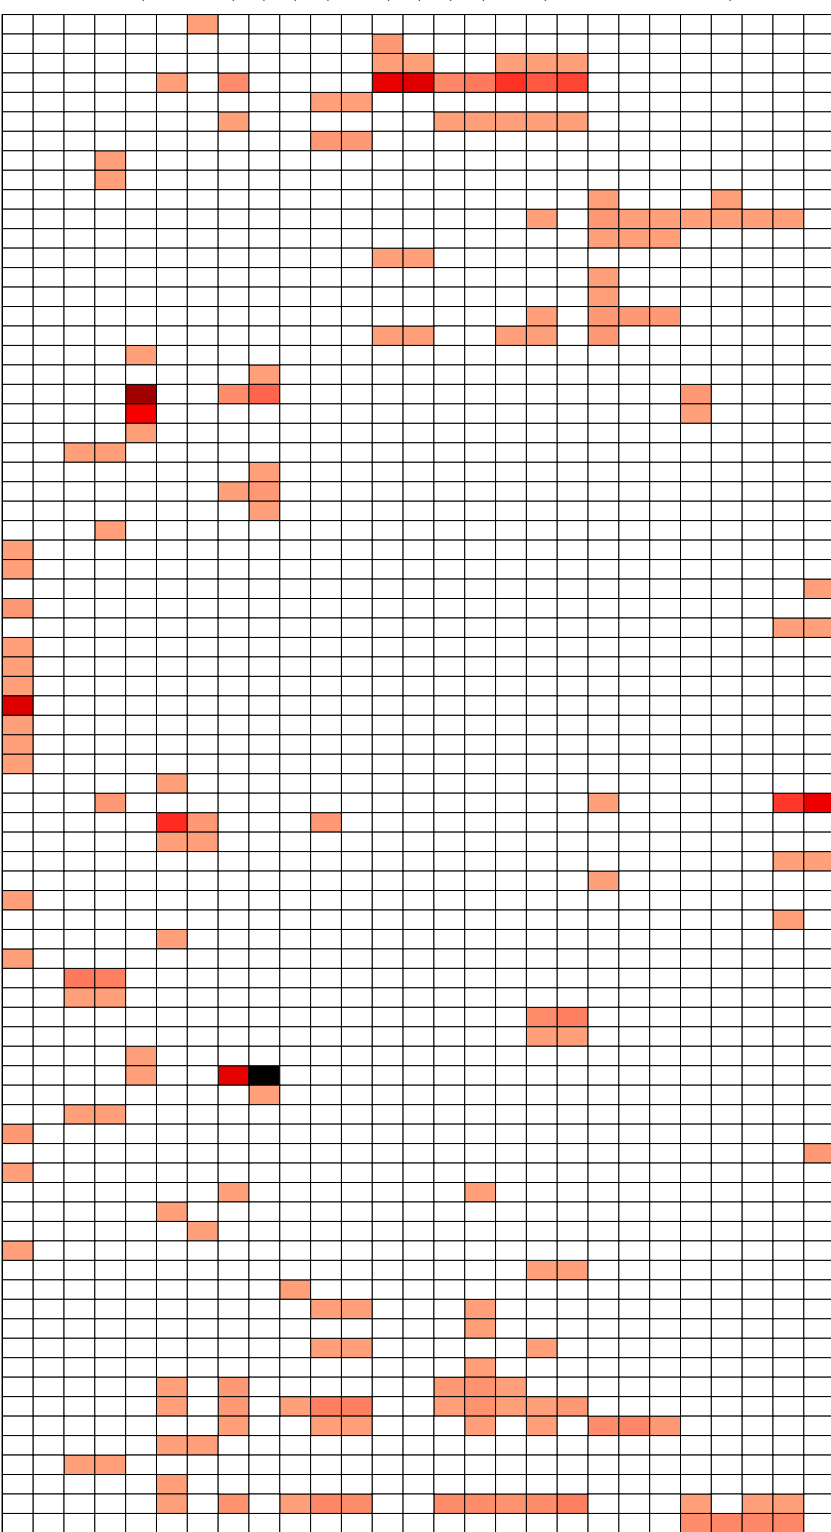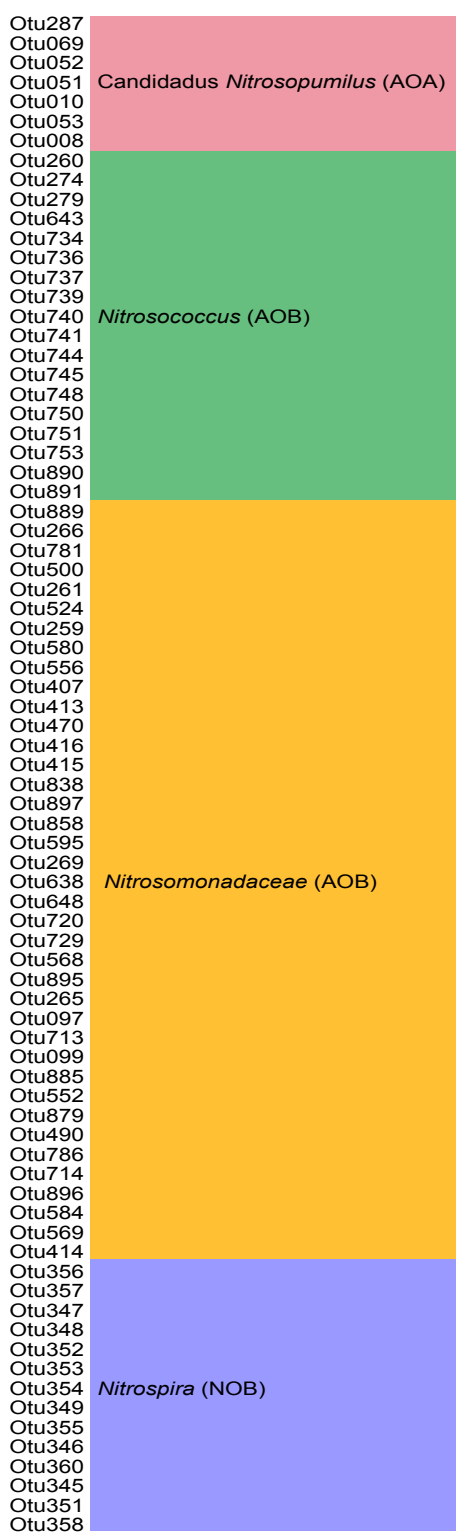

Total relative abundance (%)

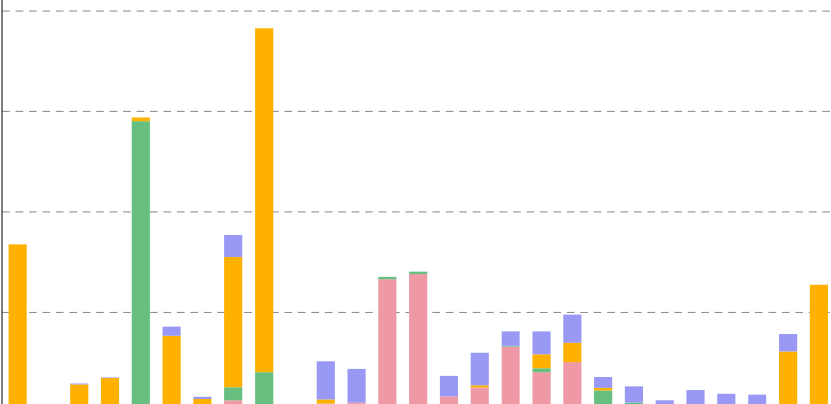

■ Candidatus *Nitrosopumilus* (AOA)  
 ■ *Nitrosococcus* (AOB)  
 ■ *Nitrosomonadaceae* (AOB)  
 ■ *Nitrospira* (NOB)
